# Supplementary material for: Postharvest Treatment with Abscisic Acid Alleviates Chilling Injury in Zucchini Fruit by Regulating Phenolic Metabolism and Non-Enzymatic Antioxidant System
Source: MDPI journal article supplement (doi:10.3390/antiox12010211), 2023-01-16
Supplement: s1 [file s1]

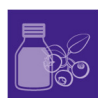

# Postharvest Treatment with Absciscic Acid Alleviates Chilling Injury in Zucchini Fruit by Regulating Phenolic Metabolism and Non-Enzymatic Antioxidant System

**Table S1.** UPLC-MS/MS conditions for the determination of soluble phenolic compounds

| Compound      | Polarity | Transition 1<br>Quantification<br>( <i>m/z</i> ) | Cone<br>voltage<br>(V) | Collision<br>energy<br>(ev) | Transition 2<br>Confirmation<br>( <i>m/z</i> ) | Cone<br>voltage<br>(V) | Collision<br>energy<br>(ev) |
|---------------|----------|--------------------------------------------------|------------------------|-----------------------------|------------------------------------------------|------------------------|-----------------------------|
| Vanillic acid | Negative | 151.14→135.59                                    | 20                     | 10                          |                                                |                        |                             |
| Ellagic acid  | Negative | 301.10→144.59                                    | 12                     | 36                          | 301.10→228.86                                  | 12                     | 26                          |
| Ferulic acid  | Negative | 192.96→133.51                                    | 2                      | 16                          | 192.96→177.64                                  | 2                      | 12                          |
| Coumaric acid | Negative | 162.82→92.94                                     | 18                     | 22                          | 162.82→118.95                                  | 18                     | 10                          |
| Quercetin     | Negative | 301.07→150.63                                    | 44                     | 20                          | 301.07→178.67                                  | 44                     | 14                          |
| Isorhamnetin  | Negative | 314.90→255.05                                    | 58                     | 20                          | 314.90→283.35                                  | 58                     | 14                          |
| Myricetin     | Negative | 316.75→162.89                                    | 20                     | 10                          | 316.75→190.92                                  | 20                     | 10                          |
| Naringenin    | Negative | 271.10→118.52                                    | 6                      | 26                          | 271.10→150.63                                  | 6                      | 18                          |
| Luteolin      | Negative | 285.08→132.52                                    | 30                     | 32                          | 285.08→150.63                                  | 30                     | 24                          |
| Rhofolin      | Negative | 577.20→210.92                                    | 72                     | 78                          | 577.20→268.92                                  | 72                     | 36                          |
| Chrysoeriol   | Negative | 299.10→255.92                                    | 26                     | 28                          | 299.10→283.94                                  | 26                     | 20                          |
